# Supplementary material for: Near infrared imaging-guided photodynamic therapy under an extremely low energy of light by galactose targeted amphiphilic polypeptide micelle encapsulating BODIPY-Br2
Source: Royal Society of Chemistry journal article supplement (doi:10.1039/c6bm00581k), 2016-01-01
Supplement: c6bm00581k1.pdf [file c6bm00581k1.pdf]

Support materials for:

## Near Infrared Imaging-guided Photodynamic Therapy under Extremely Low Energy of Light by Galactose Targeted Amphiphilic Polypeptides Micelles Encapsulating BODIPY-Br<sub>2</sub>

Le Liu, Zheng Ruan, Tuanwei Li, Pan Yuan, and Lifeng Yan \*

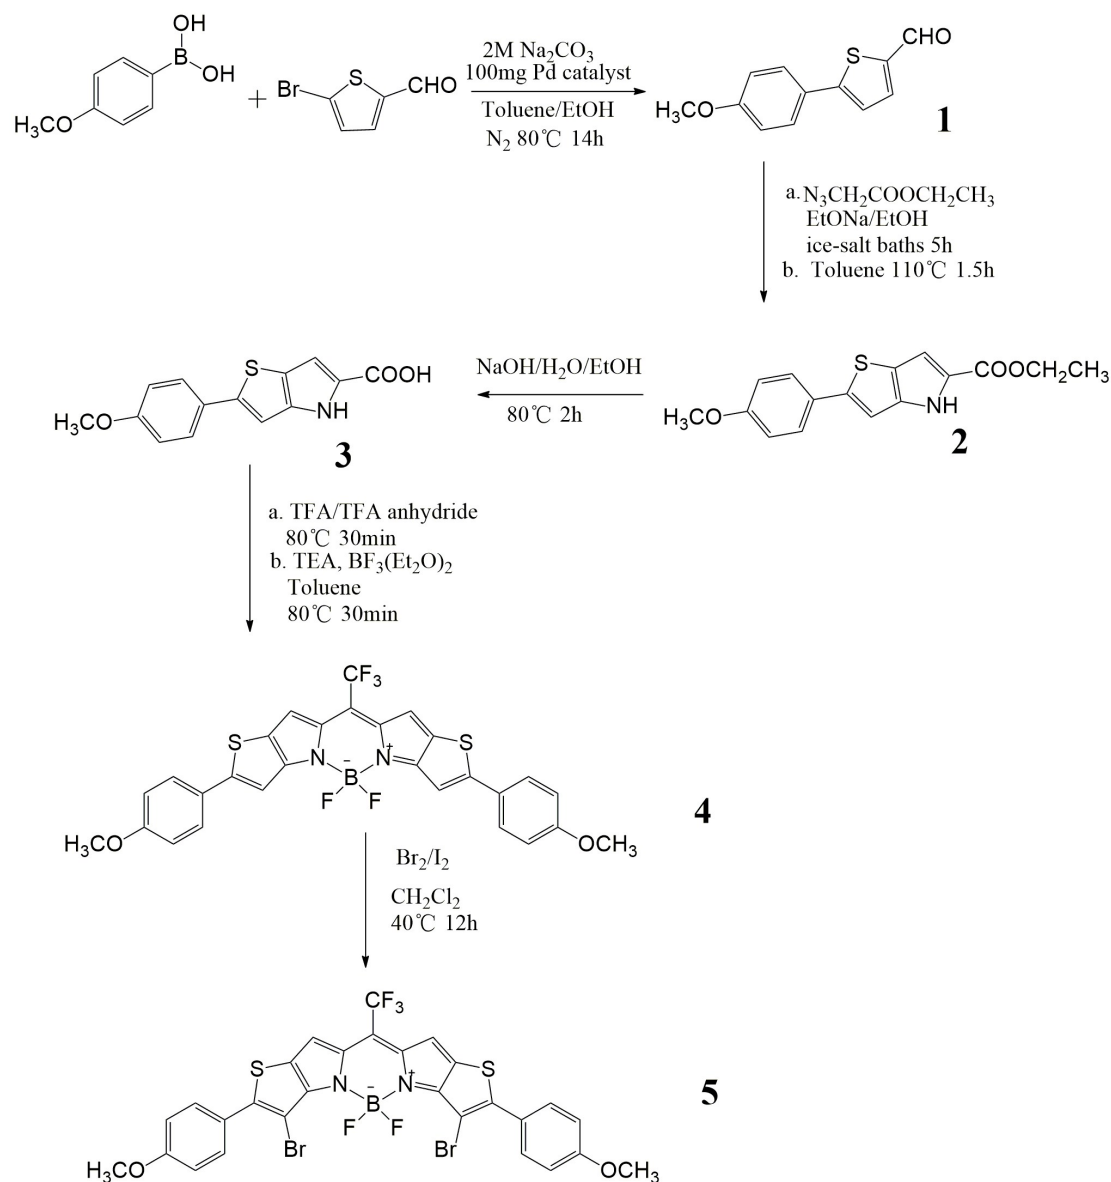

**Scheme S1.** Synthesis of the BODIPY

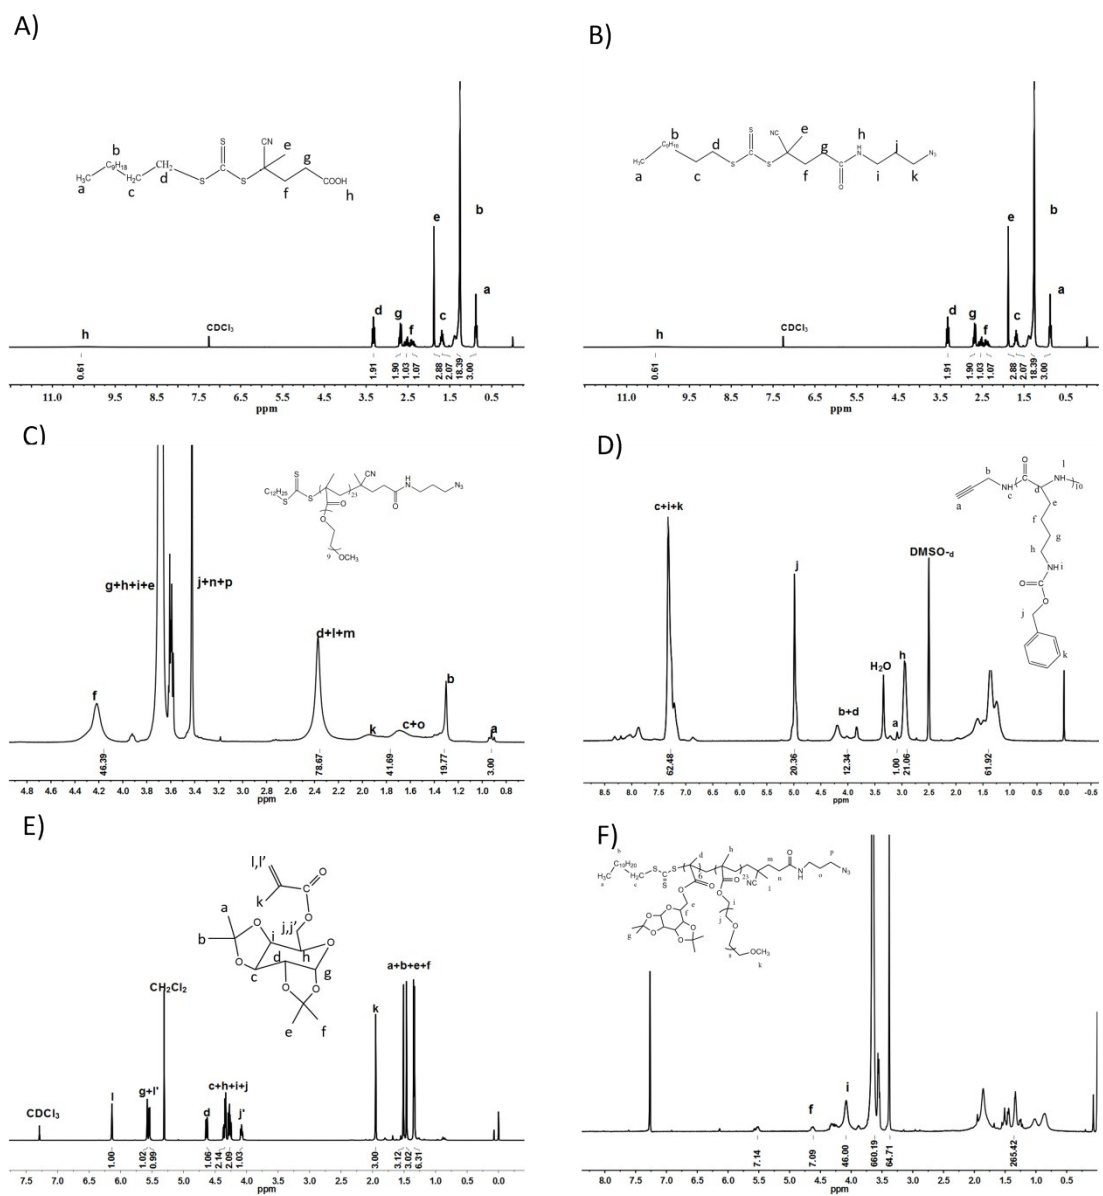

**Figure S1.**  $^1\text{H}$ -NMR of polymer synthesis: (A)RAFT-1, (B)RAFT, (C)POEGMA, (D)PLys, (E) MALpGP and (F)PMAIpGP-POEGMA.
